# Supplementary material for: Analysis of the Effects of Five Factors Relevant to In Vitro Chondrogenesis of Human Mesenchymal Stem Cells Using Factorial Design and High Throughput mRNA-Profiling
Source: PubMed Central journal article supplement (PMC4015996; doi:10.1371/journal.pone.0096615), 2014-05-09
Supplement: pone.0096615.s007.pdf [file pone.0096615.s007.pdf]

CONDITION

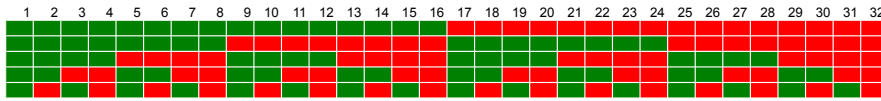

+ factor  
- factor

GENE

Table of gene expression data for 32 conditions across 5 factors. Each cell contains a numerical value representing the expression level. The table is color-coded to highlight significant changes: red for upregulation and blue for downregulation.

More than 10 fold upregulated  
2-10 fold upregulated  
0-2 fold upregulated  
Not significantly regulated  
0-2 fold downregulated  
2-10 fold downregulated  
More than 10 fold downregulated





|        |      |      |      |      |      |      |      |      |     |     |     |     |     |     |     |      |      |     |      |     |      |      |      |      |      |      |      |      |      |      |      |      |
|--------|------|------|------|------|------|------|------|------|-----|-----|-----|-----|-----|-----|-----|------|------|-----|------|-----|------|------|------|------|------|------|------|------|------|------|------|------|
| UNQ830 | 6.0  | 3.4  | 5.6  | 3.3  | 2.9  | 2.2  | 2.5  | 1.4  | 7.5 | 6.2 | 7.5 | 6.1 | 4.6 | 2.8 | 4.8 | 3.1  | 2.9  | 2.8 | 3.0  | 2.4 | 2.8  | 2.8  | 3.2  | 2.9  | 4.0  | 2.4  | 4.4  | 2.4  | 3.6  | 2.2  | 2.9  | 1.8  |
| VBP1   | 6.8  | 6.9  | 6.8  | 7.0  | 6.5  | 6.5  | 6.8  | 6.7  | 6.7 | 6.9 | 6.8 | 6.8 | 7.0 | 6.9 | 6.9 | 7.1  | 7.0  | 6.5 | 7.1  | 6.7 | 7.1  | 6.5  | 7.2  | 6.4  | 7.1  | 6.4  | 7.0  | 6.5  | 7.4  | 6.6  | 7.2  | 5.7  |
| VCAM1  | 3.4  | 5.8  | 3.0  | 5.8  | 6.5  | 8.8  | 6.8  | 8.9  | 2.2 | 3.0 | 2.0 | 2.3 | 4.9 | 7.5 | 6.5 | 7.8  | 4.8  | 6.0 | 4.1  | 5.9 | 5.9  | 9.2  | 5.9  | 9.1  | 4.4  | 6.5  | 4.5  | 6.3  | 5.0  | 9.5  | 5.3  | 9.1  |
| VCAN   | 8.3  | 8.5  | 8.0  | 8.6  | 8.4  | 8.3  | 8.4  | 8.3  | 8.0 | 8.3 | 7.9 | 8.1 | 8.7 | 9.0 | 8.7 | 8.7  | 9.6  | 9.2 | 9.3  | 9.3 | 10.0 | 7.3  | 9.7  | 7.3  | 9.7  | 10.1 | 9.7  | 10.0 | 10.5 | 8.3  | 10.7 | 8.5  |
| WNT10B | 4.6  | 3.8  | 4.3  | 3.4  | 3.9  | 2.6  | 3.8  | 2.9  | 4.4 | 5.1 | 4.1 | 5.1 | 6.2 | 5.0 | 6.1 | 4.7  | 2.1  | 1.2 | 2.0  | 1.2 | 2.4  | 1.0  | 2.6  | 0.8  | 2.7  | 2.1  | 4.3  | 0.8  | 2.7  | 2.9  | 1.7  | 2.3  |
| WNT11  | 8.5  | 6.8  | 6.2  | 6.5  | 5.6  | 4.8  | 5.3  | 4.6  | 9.4 | 9.2 | 9.4 | 9.2 | 8.7 | 7.4 | 8.4 | 7.4  | 3.6  | 2.9 | 3.3  | 3.0 | 4.1  | 2.7  | 3.8  | 2.9  | 5.6  | 3.5  | 5.8  | 3.5  | 5.1  | 3.6  | 5.3  | 4.0  |
| WNT3A  | 3.2  | 2.8  | 3.0  | 2.9  | 2.8  | 2.5  | 2.9  | 2.8  | 4.4 | 3.7 | 3.9 | 3.8 | 2.8 | 2.5 | 2.1 | 3.0  | 1.1  | 1.6 | 1.4  | 1.6 | 2.0  | 1.9  | 2.6  | 0.8  | 0.9  | 1.1  | 1.2  | 1.7  | 3.3  | 2.6  | 2.9  | 1.8  |
| WNT4   | 3.8  | 2.5  | 3.8  | 2.2  | 2.3  | 2.1  | 3.0  | 2.7  | 4.4 | 4.0 | 4.5 | 4.2 | 3.8 | 3.1 | 2.5 | 2.8  | 2.1  | 2.2 | 2.4  | 1.6 | 2.6  | 1.8  | 3.5  | 1.2  | 2.4  | 2.2  | 2.8  | 2.1  | 3.0  | 2.1  | 3.5  | 2.4  |
| WNT5A  | 10.5 | 10.2 | 10.4 | 10.3 | 11.7 | 11.3 | 11.0 | 11.3 | 7.9 | 7.6 | 7.8 | 7.6 | 9.8 | 9.8 | 9.9 | 10.1 | 11.8 | 9.5 | 11.8 | 9.6 | 12.4 | 11.3 | 12.4 | 11.4 | 10.1 | 8.5  | 10.1 | 8.4  | 12.1 | 10.5 | 12.2 | 10.4 |
| WNT5B  | 8.0  | 8.5  | 7.9  | 8.6  | 8.5  | 8.4  | 8.7  | 8.4  | 6.4 | 7.1 | 6.4 | 7.1 | 7.8 | 8.1 | 8.1 | 8.1  | 7.5  | 8.1 | 7.5  | 8.0 | 7.0  | 7.0  | 6.8  | 7.1  | 6.5  | 7.5  | 6.2  | 7.8  | 7.6  | 7.1  | 7.6  | 7.5  |
| WNT7A  | 3.4  | 2.4  | 3.0  | 2.3  | 2.4  | 1.8  | 2.8  | 1.6  | 4.7 | 3.4 | 4.4 | 3.9 | 2.7 | 2.6 | 2.8 | 1.1  | 2.8  | 2.3 | 2.6  | 1.8 | 1.6  | 2.8  | 2.0  | 1.4  | 2.9  | 2.4  | 2.4  | 2.8  | 3.4  | 2.4  | 3.2  | 3.5  |
| ZBTB16 | 6.8  | 7.0  | 6.8  | 6.9  | 3.6  | 2.7  | 3.1  | 2.8  | 6.7 | 6.2 | 6.3 | 6.4 | 3.0 | 3.4 | 3.3 | 1.5  | 8.9  | 8.7 | 9.0  | 8.8 | 3.6  | 2.6  | 3.1  | 0.2  | 9.0  | 3.7  | 8.7  | 9.7  | 3.9  | 2.7  | 3.4  | 1.6  |
| ZNF277 | 6.4  | 6.6  | 6.4  | 6.3  | 6.3  | 6.2  | 6.5  | 6.2  | 6.1 | 6.0 | 6.1 | 6.0 | 6.2 | 6.4 | 5.6 | 6.4  | 7.5  | 7.0 | 7.2  | 7.0 | 6.9  | 6.1  | 6.8  | 6.2  | 7.2  | 7.7  | 7.0  | 7.7  | 7.4  | 6.5  | 7.2  | 6.3  |
| ZNF521 | 6.1  | 6.2  | 5.8  | 6.2  | 5.9  | 6.1  | 5.7  | 6.1  | 6.1 | 6.1 | 5.9 | 6.3 | 5.9 | 6.1 | 5.2 | 6.3  | 5.7  | 5.8 | 6.0  | 5.9 | 6.1  | 6.5  | 6.0  | 6.5  | 5.9  | 6.6  | 5.7  | 6.3  | 6.3  | 6.7  | 6.2  | 6.3  |
| ZNF533 | 6.5  | 4.9  | 6.4  | 4.7  | 4.1  | 1.7  | 3.3  | 2.2  | 7.7 | 7.1 | 7.7 | 7.2 | 6.0 | 4.0 | 5.5 | 3.9  | 2.3  | 2.4 | 2.1  | 2.4 | 2.4  | 1.2  | 3.1  | 2.7  | 4.8  | 3.7  | 4.1  | 3.6  | 3.6  | 2.0  | 1.5  | 1.9  |
